# Supplementary material for: Relating hygroscopicity and optical properties to chemical composition and structure of secondary organic aerosol particles generated from the ozonolysis of α-pinene
Source: Copernicus journal article supplement (doi:10.5194/acp-15-3339-2015), 2015-03-25
Supplement: Supplementary file 1 [file acp-15-3339-2015-supplement.pdf]

Supplement of Atmos. Chem. Phys., 15, 3339–3358, 2015  
<http://www.atmos-chem-phys.net/15/3339/2015/>  
doi:10.5194/acp-15-3339-2015-supplement  
© Author(s) 2015. CC Attribution 3.0 License.

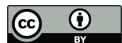

*Supplement of*

**Relating hygroscopicity and optical properties to chemical composition and structure of secondary organic aerosol particles generated from the ozonolysis of  $\alpha$ -pinene**

**C. Denjean et al.**

*Correspondence to:* C. Denjean (denjean@tropos.de)

## Supplementary material

### 1. Correction of the spectral attenuation coefficient ( $\sigma_{\text{attn}}$ ) obtained with the aethalometer

$\sigma_{\text{attn}}$  obtained with the aethalometer were corrected for various systematic errors. We applied the empirical correction described by Collaud Coen *et al.* (2010) which includes  $R$ , the attenuation effect due to light absorbing particles accumulating on the filter,  $C_{\text{ref}}$ , the multiple scattering by the filter fibres and  $\alpha$ , the scattering correction due to scattering of aerosols embedded in the filter:

$$\sigma_{\text{abs}}(\lambda, m) = \frac{\sigma_{\text{ATTN}}(\lambda, m) - \alpha(\lambda) \cdot \sigma_{\text{scatt}}(\lambda, m)}{C_{\text{ref}} \cdot R}$$

$R$  decreases with the gradual increase of attenuation due to the accumulation of absorbing particles embedded in the filter. As will be shown in the section 3.2., the attenuation modification during SOA measurement was very low, indicating weakly light absorbing particles. Thus, we assumed that  $R$  was equal to unity.

$C_{\text{ref}}$  can be estimated by comparing  $\sigma_{\text{attn}}$  measured with the aethalometer measurements and  $\sigma_{\text{abs}}$  obtained from a non-filter based instrument (for example a photoacoustic photometer). However, simultaneous measurements with these two instruments were not possible during the reported experiments. Weingartner *et al.* (2003) estimated that soot particles coated with  $\alpha$ -pinene- $\text{O}_3$  SOA were characterised by  $C_{\text{ref}} = 3.64 \pm 0.98$  and  $3.90 \pm 0.56$  at 450 and 660 nm respectively. We used the average  $C_{\text{ref}} = 3.77 \pm 2.11$  of these values to correct  $\sigma_{\text{attn}}$  in this study.

$\alpha(\lambda)$  was deduced from the  $\sigma_{\text{attn}}$  measured by the aethalometer with non-absorbing ammonium sulfate particles according to the method described by Arnott *et al.* (2005) at the 7-wavelengths of the aethalometer. We used the value of  $\alpha(\lambda) = 1.3 \cdot 10^{-3} \cdot \lambda^{5.6 \cdot 10^{-1}}$  estimated by Denjean *et al.* (2014). The values of  $\sigma_{\text{scat}}$  at the wavelengths of the aethalometer other than

27 525 nm were derived from calculations based on Mie theory, measured size distributions and  
28 the constant CRI retrieved at 525 nm.

29

30 2. Quantification of the O:C at the surface of SOA from the XPS analysis

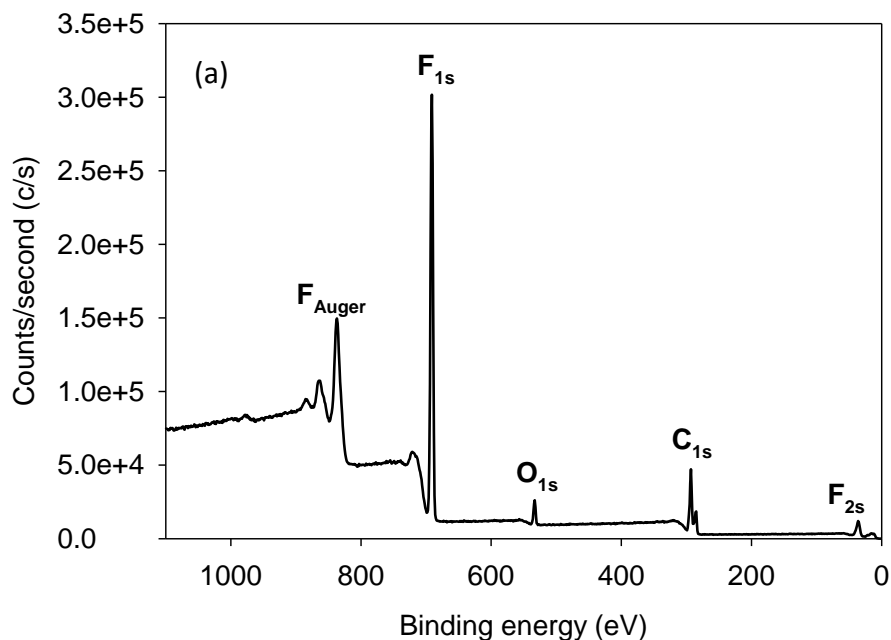

31

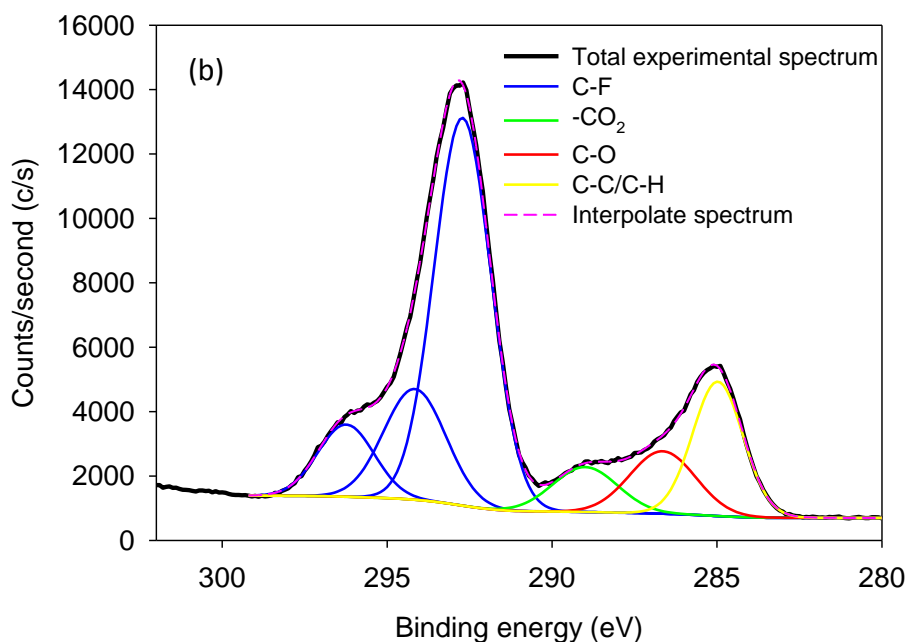

32

33 Figure S1. XPS spectra of SOA: (a) survey spectrum and (b) deconvolution of the high-  
34 resolution spectra C<sub>1s</sub> region. The reported three peaks represent different states of Carbon,  
35 respectively C-F, -CO<sub>2</sub>, C-O, C-C and C-H.

### 36 3. Yields – literature comparison

37 The comparison between the steady-state aerosol yields determined in this study and the  
 38 values reported in the literature is shown in Figure S2. To facilitate the comparison with the  
 39 literature, we adjusted our yield data to a SOA density of  $1.0 \text{ g m}^{-3}$ . Our yields are in  
 40 agreement with Hoffmann et al. (1997), but up to 2 times lower compared to other studies  
 41 (Wang et al., 2011; Griffin et al., 1999; Cocker et al., 2001; Saathoff et al., 2009; Shilling et al.  
 42 2008). These differences arise from instrumental and treatment uncertainties, as shown by  
 43 the error bars. Shilling et al. (2008) investigated several possible artefacts and sources of error  
 44 that could reasonably influence yield values. They suggested that different gas-phase  
 45 chemistry or partitioning of species on the surface of the walls could occur within the  
 46 chambers. However, our yields can be directly compared to the values reported by Wang et al.  
 47 (2011) who performed experiments in a similar simulation chamber as ours. Our values are  
 48 systematically lower than those reported by Wang et al. (2011) by approximately 20%. One  
 49 major issue differentiating our experimental conditions is the initial concentration of ozone.  
 50 Wang et al. (2011) performed experiments with an excess of ozone, while we used  
 51 significantly lower ozone concentration to generate SOA. It is expected that a lower  
 52 concentration of OH radicals was produced from our experiments during the ozonolysis of  $\alpha$ -  
 53 pinene, which could reduce the aerosol yield of the reaction.

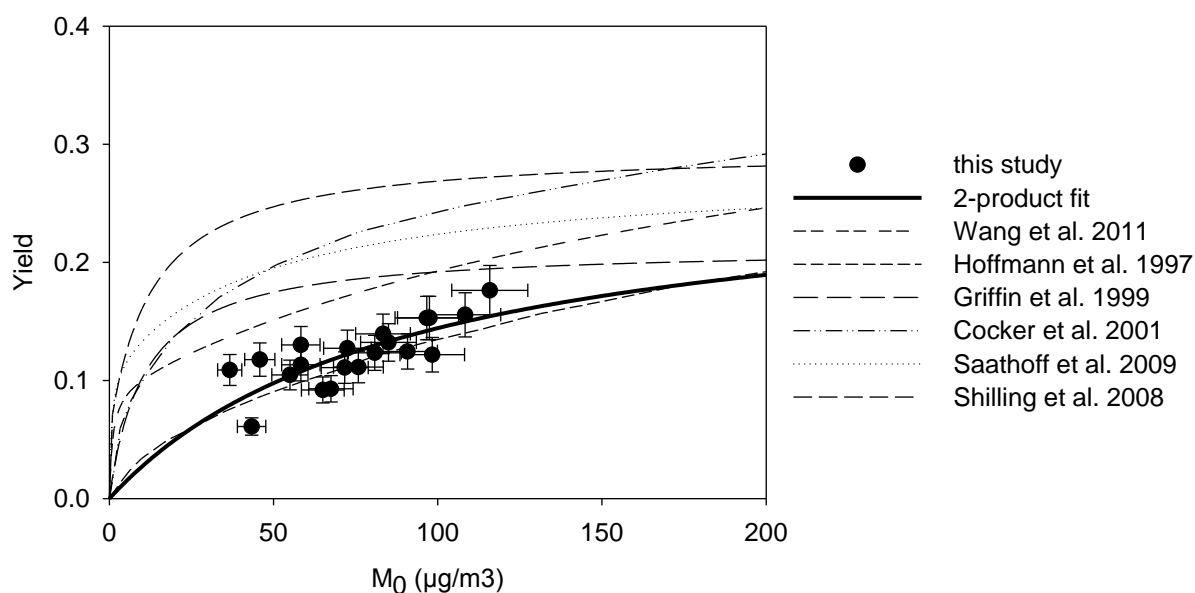

54 Figure S2. Comparison of aerosol yield obtained in this study to those of other studies for  
 55 the dark ozonolysis of  $\alpha$ -pinene. We adjusted our data to a SOA density of  $1.0 \text{ g m}^{-3}$  to  
 56 facilitate the comparison with the literature. The solid black line shows the fit of our data  
 57 for a two-product model  $Y = M_0 \sum_i \frac{\alpha_i K_i}{1 + K_i M_0}$  (Odum et al., 1996). We estimated  $\alpha_1=0.275$ ,  
 58  $\alpha_2=0.001$ ,  $K_1=0.011$ ,  $K_2=0.001$ .  
 59

60 4. Absorption coefficient of SOA particles in the visible to near-UV region

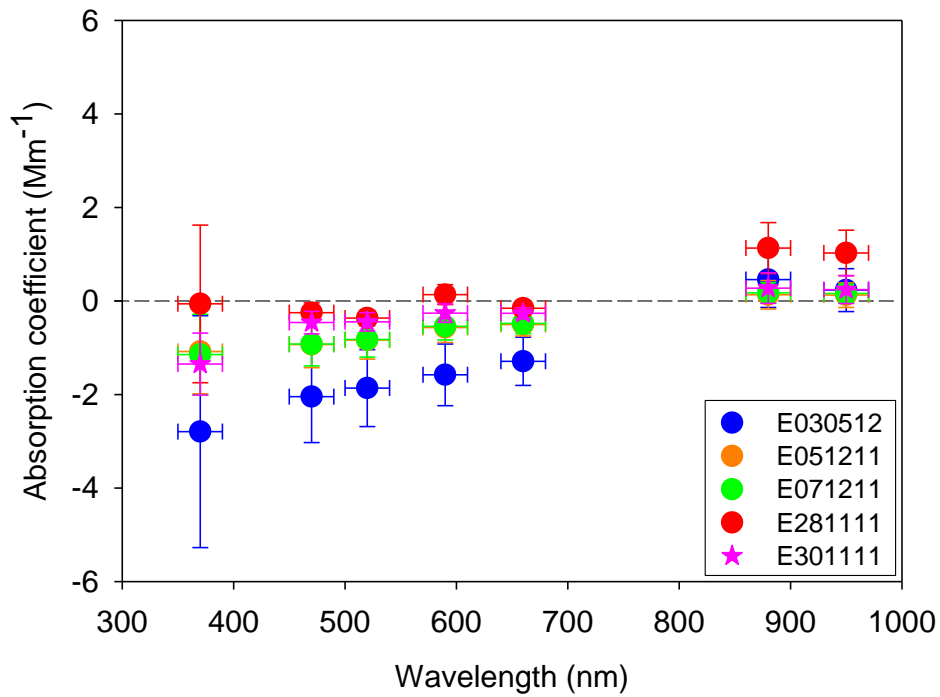

61

62 Figure S3: Wavelength dependence of the spectral absorption coefficients of  $\alpha$ -pinene- $O_3$   
63 SOA after 14 hours of reaction

64

65 5. Evolution of the SOA functionality during the reaction

66

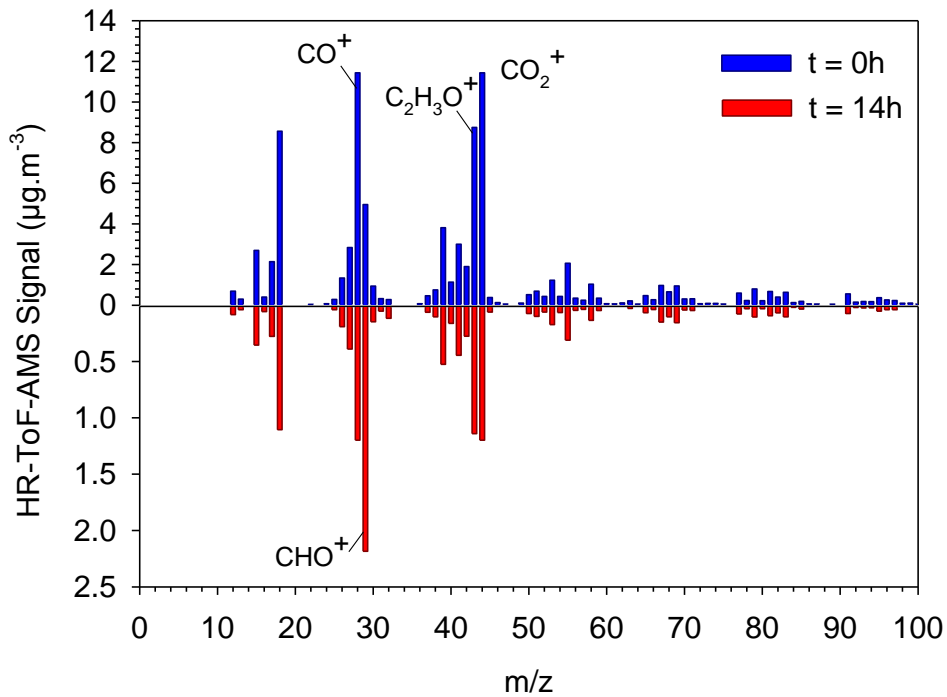

67

68 Figure S4. AMS mass spectra of  $\alpha$ -pinene- $O_3$  SOA after 1 hour of reaction (red) and after 14  
69 hours of reaction (blue).

70 The correlation between  $f_{44}$  and  $f_{43}$  for  $\alpha$ -pinene- $O_3$  SOA has been compared in Figure S5 to  
 71 laboratory data obtained by Shilling et al. (2009) and ambient SOA ground and flight data  
 72 from different sites, including Mexico city (Ng et al., 2010). Our data are within the triangular  
 73 region of the typical ambient SOA, but exhibit higher  $f_{44}$  than Shilling et al. (2009). This  
 74 discrepancy may be due to the use of OH scavengers by the latter. Previous laboratory studies  
 75 have observed an increase of the O:C ratio of  $\alpha$ -pinene- $O_3$  SOA after OH exposure (Tritscher  
 76 et al., 2011; Cappa et al., 2011; Qi et al., 2012; George and Abbatt, 2010; Donahue et al.,  
 77 2012). Since  $f_{44}$  is the major contributor to the oxygen signal in the SOA spectra, this  
 78 fragment may increase with OH exposure formation of carboxylic acids (Muller et al., 2012).

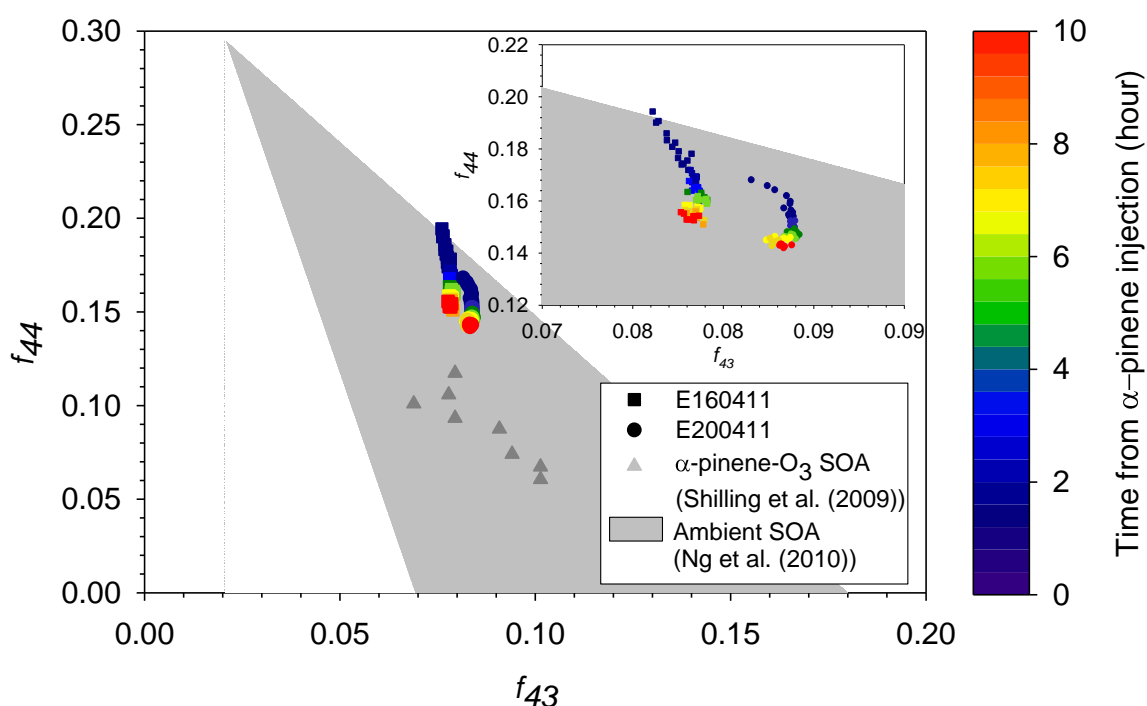

79

80 Figure S5.  $f_{44}$  as a function of  $f_{43}$  during the  $\alpha$ -pinene- $O_3$  SOA reaction, including  
 81 experimental data obtained in this study (symbols) and in Shilling et al. (2009), as well as  
 82 typical ambient SOA (Ng et al., 2010).

83

#### 84 6. Analysis of SOA particles by MET

85 Electron microscopy analysis was used to investigate the shape of SOA particles. SOA  
 86 particles were collected after 1 hour and 14 hours of reaction on copper TEM  
 87 grids fixed on fibre glass filters (Whatman, 47 mm diameter, 0.7 $\mu$ m porosity). Analytical  
 88 transmission electron microscopy (TEM) was performed with an instrument type JEOL  
 89 100CXII equipped with a X-ray energy-dispersive spectrometer (PGT Prism 2000 Si(Li))

90 detector and Avalon analyzer, Princeton Gamma-Tech, USA. In total, 50 particles have been  
91 analyzed by TEM. Figure S4 (Supplementary Material) shows an example of SOA particles  
92 after 1 and 14 hours of reaction. Only spherical particles have been observed in the samples.

93

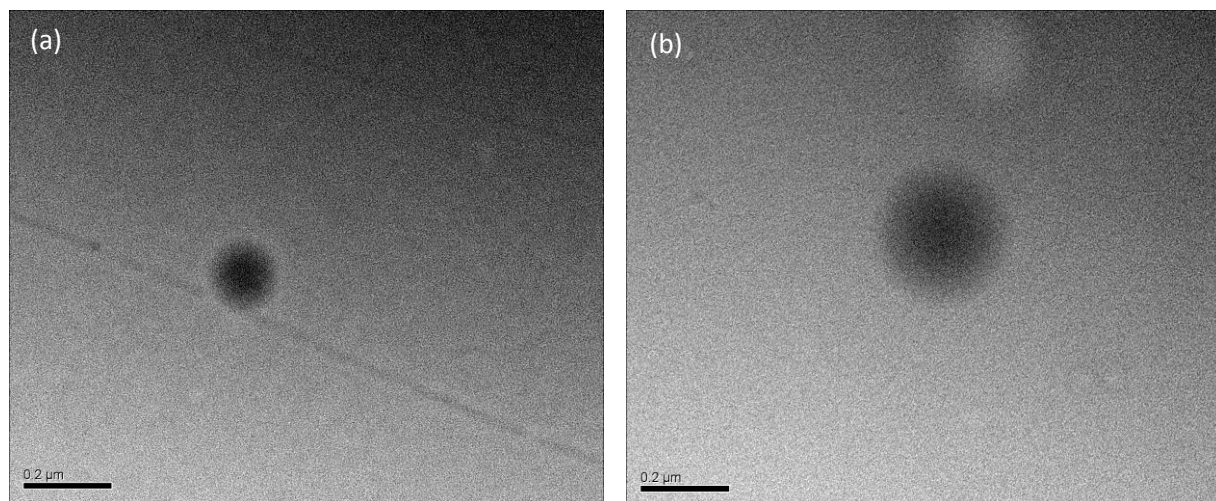

94  
95 Figure S6. Examples of TEM images of  $\alpha$ -pinene- $O_3$  SOA (a) after 1 hour and (b) 14 hours of  
96 reaction.  
97
